# Supplementary material for: Trion dynamics and charge photogeneration in MoS2 nanosheets prepared by liquid phase exfoliation
Source: Royal Society of Chemistry journal article supplement (doi:10.1039/d1cp02455h), 2021-01-01
Supplement: d1cp02455h1.pdf [file d1cp02455h1.pdf]

## Supporting Information

### Trion dynamics and charge photogeneration in MoS<sub>2</sub> nanosheets

#### prepared by liquid phase exfoliation

**Yuan-Yuan Yue,<sup>†</sup> Le-Yi Zhao,<sup>†</sup> Dan-Ao Han,<sup>†</sup> Lei Wang,<sup>\*,†</sup> Hai-Yu Wang,<sup>\*,†</sup> Bing-Rong Gao,<sup>†</sup> and Hong-Bo Sun<sup>‡</sup>**

<sup>†</sup>State Key Laboratory of Integrated Optoelectronics, College of Electronic Science and Engineering, Jilin University, 2699 Qianjin Street, Changchun 130012, China.

<sup>‡</sup>State Key Laboratory of Precision Measurement Technology and Instruments, Department of Precision Instrument, Tsinghua University, Haidian, Beijing 100084, China.

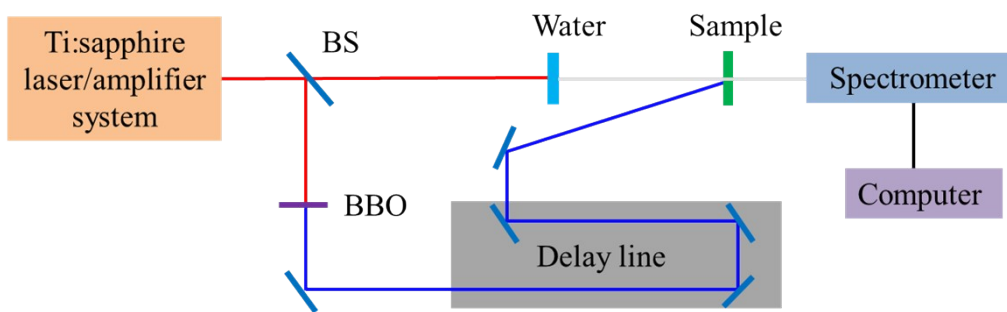

**Figure S1.** The schematic of femtosecond transient absorption setup.

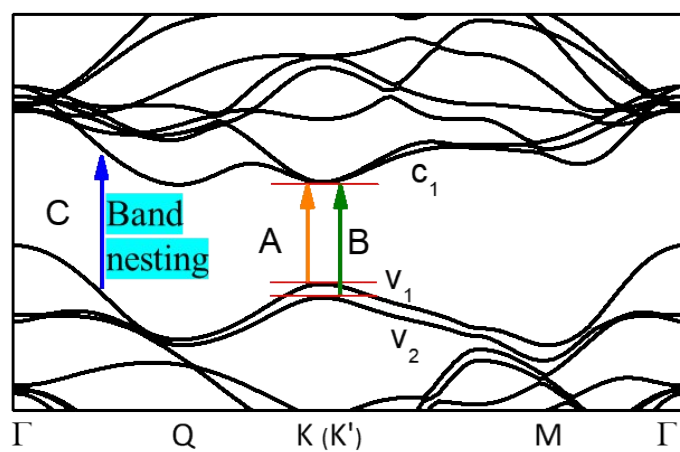

**Figure S2.** The schematic of multilayer MoS<sub>2</sub> band structure. The band-nesting nature of C-exciton state still calls for deep investigations in future.

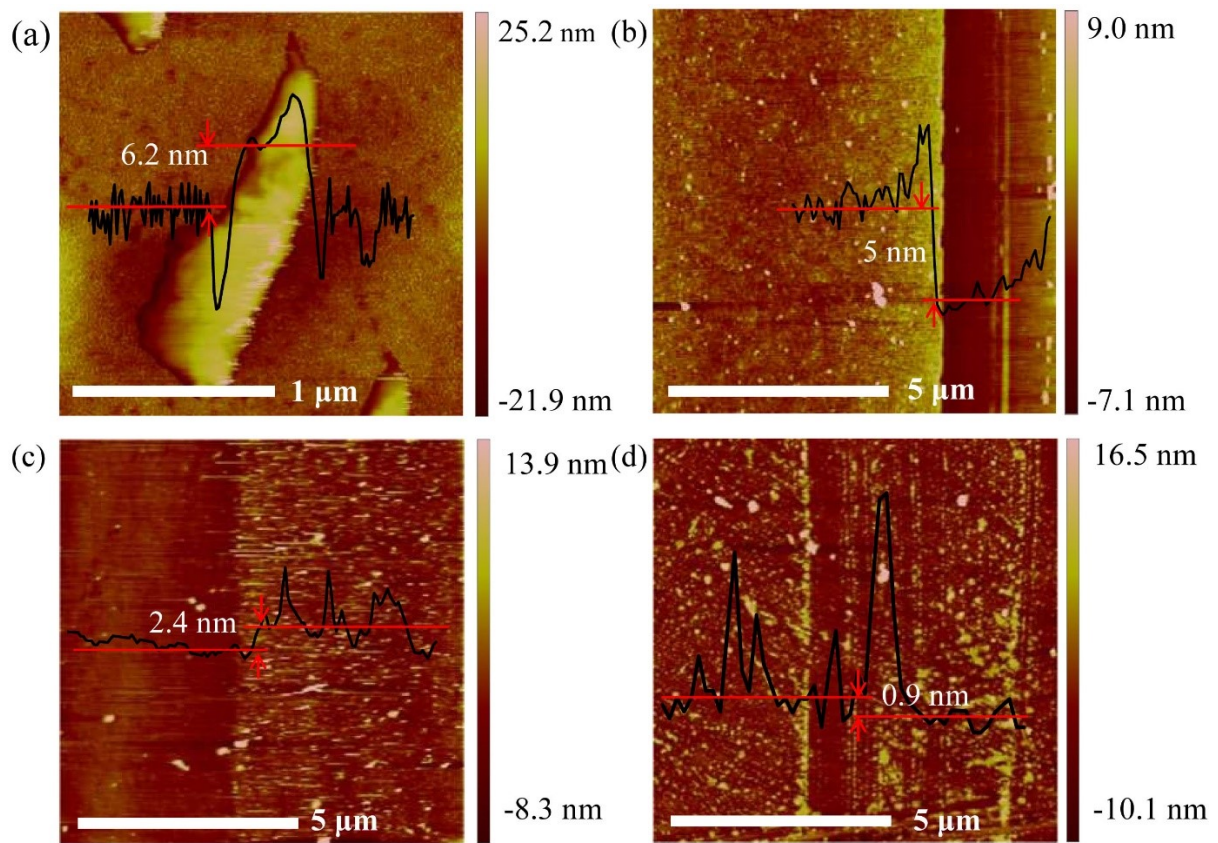

**Figure S3.** The AFM images of (a) LPE-MoS<sub>2</sub> nanosheets, CVD grown (b) 7L-, (c) 3L- and (d) 1L- MoS<sub>2</sub> films.

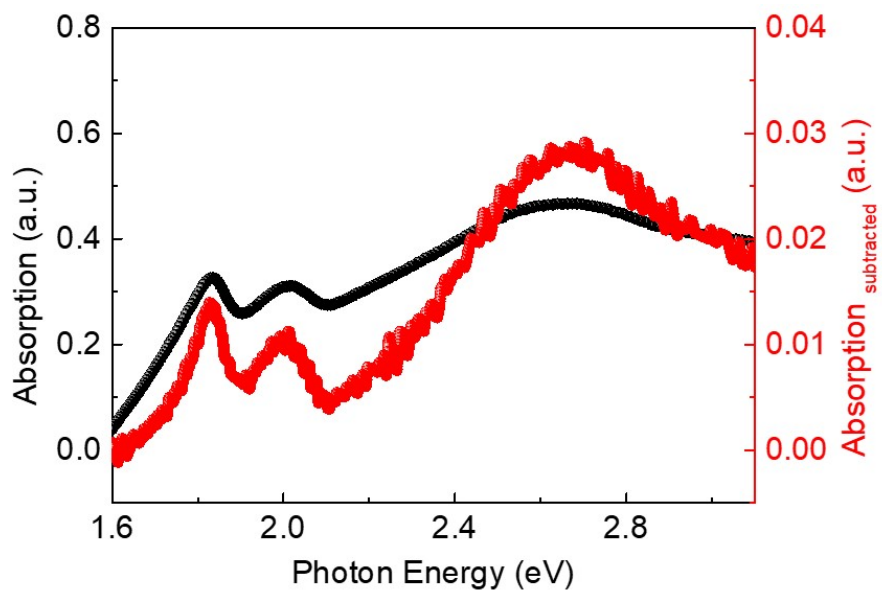

**Figure S4.** The absorption spectra before (black) and after (red) a background removal.

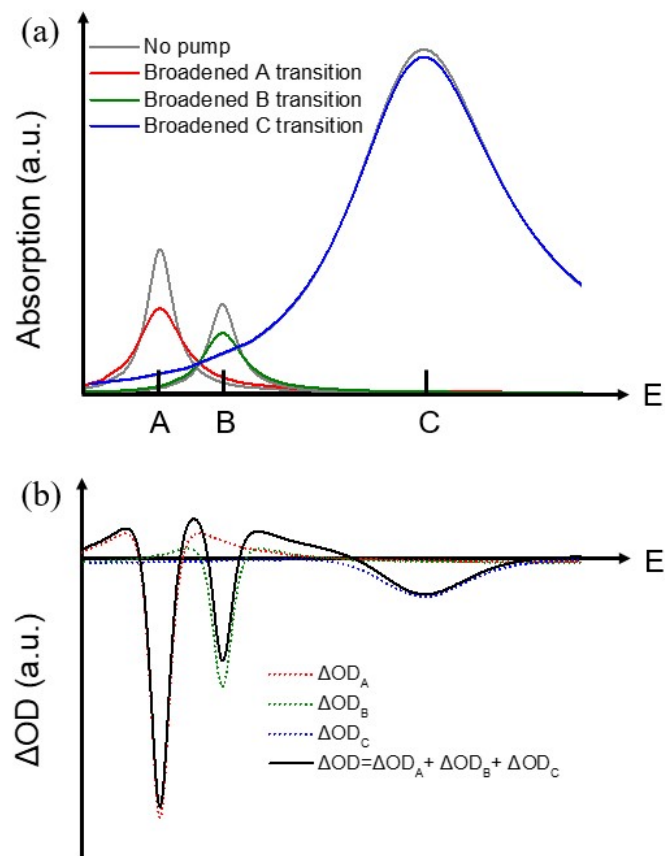

**Figure S5.** Schematic illustration for the spectral overlapping of exciton states in TA experiments. (a) Three Lorentzian functions corresponding to the exciton resonance peaks of  $X_A$ ,  $X_B$  and  $X_C$  states without pump are shown in grey curves. After pump, those Lorentzian curves are broadened (color curves). (b) The TA spectra are fitted by adjusting the parameters (the linewidths) of those Lorentzian functions.

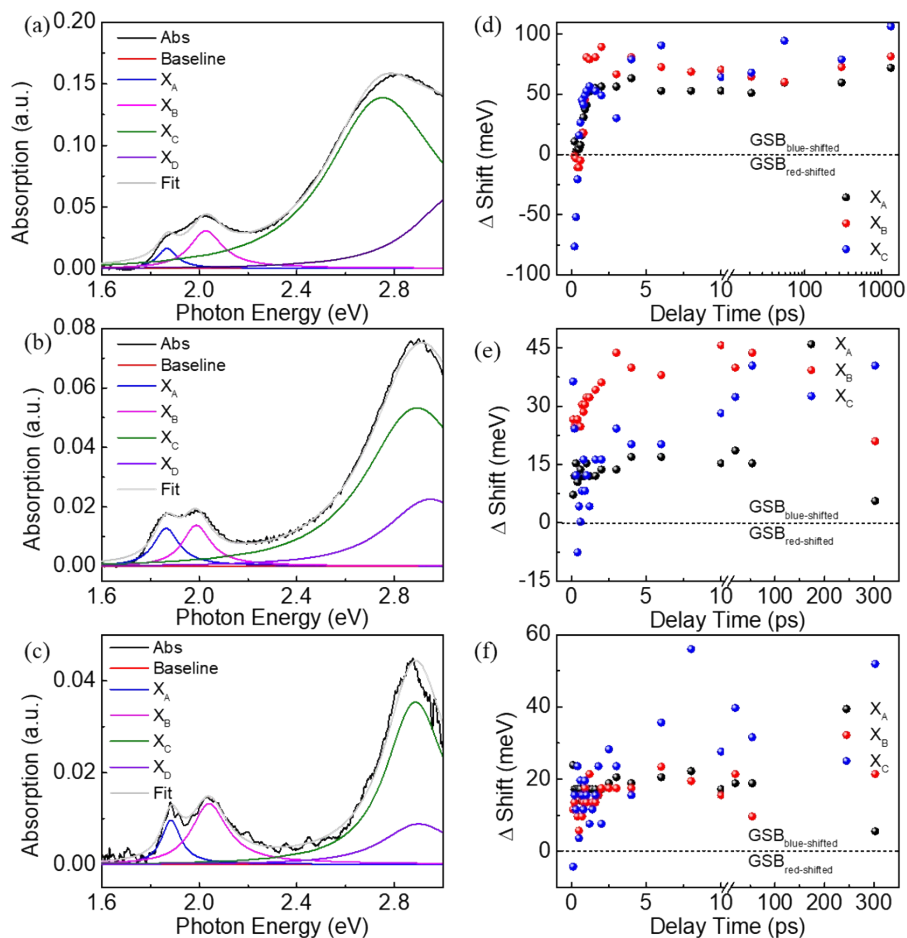

**Figure S6.** Multi-peak fitting for the steady-state absorption spectra (black line, its background has been subtracted) of CVD grown (a) 7L, (b) 3L and (c) 1L MoS<sub>2</sub> films by absorption Lorentzian functions. The peak shifting kinetics of X<sub>A</sub>, X<sub>B</sub> and X<sub>C</sub> states as a function of delay time for CVD grown (d) 7L, (e) 3L and (f) 1L MoS<sub>2</sub> films.

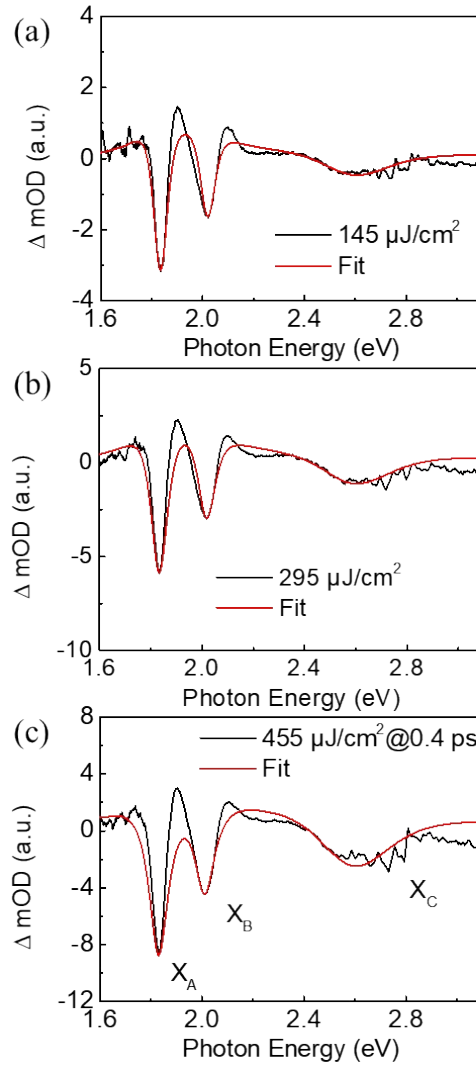

**Figure S7.** Peak broadening in LPE-MoS<sub>2</sub> nanosheets. TA spectra probed at initial delay times are fitted by summarizing the differential spectra of absorption Lorentzian with only varying peak widths for all the three exciton states under 400 nm excitation with the pump density of (a) 145, (b) 295 and (c) 455  $\mu\text{J}/\text{cm}^2$ , respectively. At the pump density of 455  $\mu\text{J}/\text{cm}^2$ , the fitted curve has already presented obvious deviations in comparison with the initial TA spectrum, even for the GBS peak of X<sub>A</sub>. At a larger pump density condition, like 885  $\mu\text{J}/\text{cm}^2$ , this fitting method does not work, since the deviations are too large to accept for fitting the initial TA spectrum by only considering peak broadening effect. This could be due to that for high pump density conditions, the other quasiparticles including trions (like X<sub>A</sub><sup>-</sup>) and charges (like C-charges) are also responsible for the initial TA spectrum of LPE-MoS<sub>2</sub> nanosheets as shown in Figure 4a.



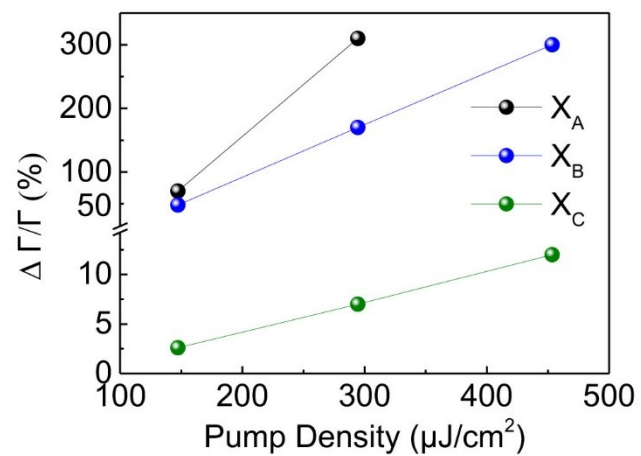

**Figure S8.** Peak broadening of  $X_A$ ,  $X_B$  and  $X_C$  states as a function of pump density at the initial decay time (maximum values).

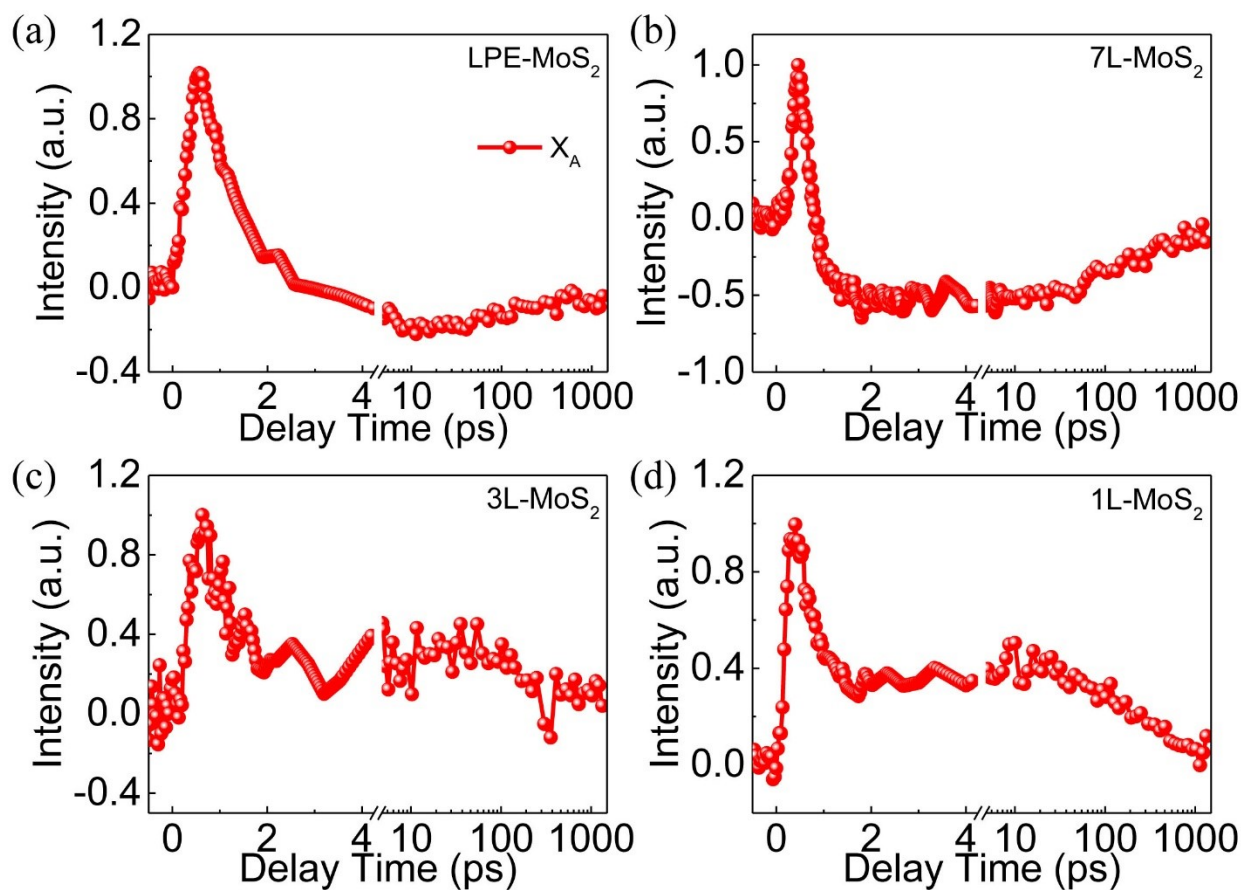

**Figure S9.** Normalized dynamics of  $X_A$  states under relatively low pump densities for (a) LPE-MoS<sub>2</sub> nanosheets, CVD grown (b) 7L-, (c) 3L- and (d) 1L-MoS<sub>2</sub> films. Due to the overlapping between the negative GSB signals and large positive signals at the  $X_A$  states of LPE-MoS<sub>2</sub> nanosheets and CVD grown 7L-MoS<sub>2</sub> films, it is hard to fit a satisfactory result for the corresponding  $X_A$  dynamics. It is the same reason that we cannot fit the  $X_A$  dynamics of all samples under relatively high pump densities.

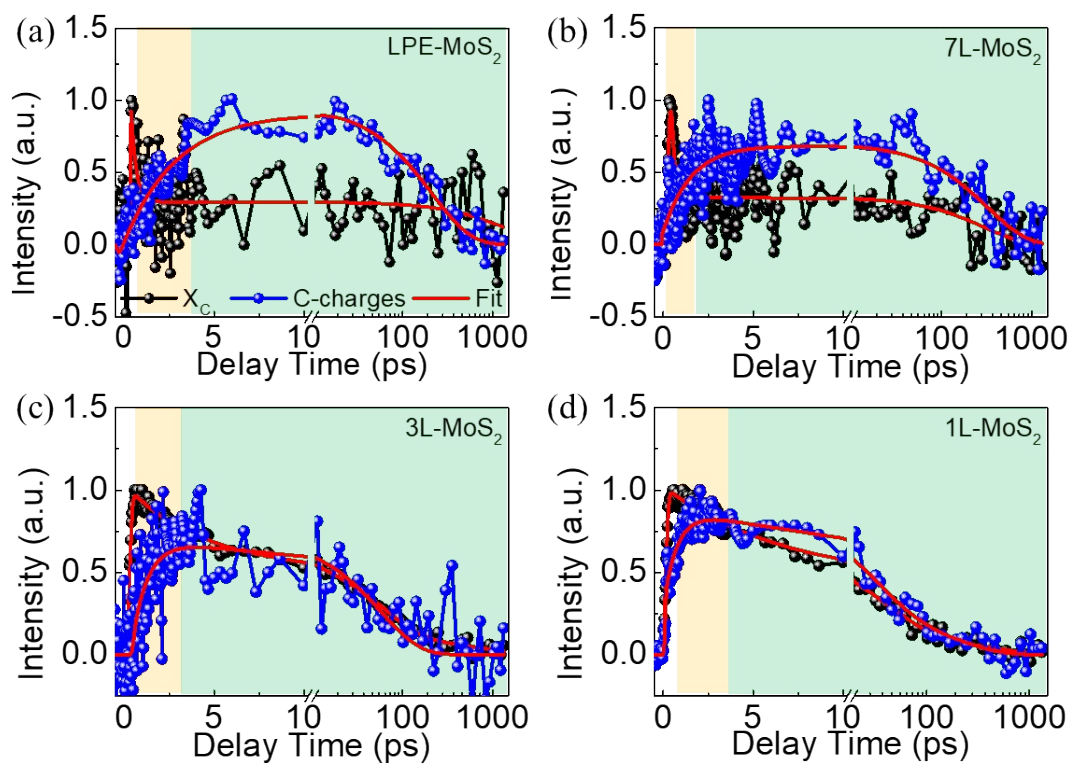

**Figure S10.** Normalized dynamics of  $X_C$  and C-charge states under relatively low pump densities for (a) LPE-MoS<sub>2</sub> nanosheets, CVD grown (b) 7L-, (c) 3L- and (d) 1L-MoS<sub>2</sub> films.

**Table S1.** Exciton binding energy of LPE-MoS<sub>2</sub> nanosheets, CVD grown 7L, 3L and 1L MoS<sub>2</sub> films.

|                      | X <sub>A</sub> (meV) | X <sub>B</sub> (meV) | X <sub>C</sub> (meV) |
|----------------------|----------------------|----------------------|----------------------|
| LPE-MoS <sub>2</sub> | 77                   | 76                   | -70                  |
| 7L-MoS <sub>2</sub>  | 60                   | 70                   | -76                  |
| 3L-MoS <sub>2</sub>  | 20                   | 44                   | -8                   |
| 1L-MoS <sub>2</sub>  | 22                   | 20                   | -4                   |

**Table S2.** Best-Fit Parameters of Peak Broadening for  $X_A$ ,  $X_B$  and  $X_C$  States in  $\text{MoS}_2$  Nanosheets by a Multi-Exponential Function,  $I(t) \propto \sum_i A_i \exp(-t/\tau_i)$ , at a Pump Density of  $145 \mu\text{J}/\text{cm}^2$  in Figure 3.

| Probe | $\tau_{\text{decay 1}}$ (ps) | $\tau_{\text{decay 2}}$ (ps) |
|-------|------------------------------|------------------------------|
| $X_A$ | $0.39 \pm 0.02$ (92%)        | $2140 \pm 107$ (8%)          |
| $X_B$ | $0.57 \pm 0.02$ (88%)        | $1460 \pm 73$ (12%)          |
| $X_C$ | $0.13 \pm 0.01$ (80%)        | $6580 \pm 329$ (20%)         |

**Table S3.** Best-Fit Parameters of  $X_A^-$  States in  $\text{MoS}_2$  Materials by a Multi-Exponential Function,  $I(t) \propto \sum_i A_i \exp(-t/\tau_i)$ , at a Relatively Low Pump Density in Figure 5.

| Sample                    | Probe   | $\tau_{\text{arising}}$ (ps) | $\tau_{\text{decay 1}}$ (ps) | $\tau_{\text{decay 2}}$ (ps) | $\tau_{\text{decay-avg}}$ (ps) |
|---------------------------|---------|------------------------------|------------------------------|------------------------------|--------------------------------|
| $\text{MoS}_2$ nanosheets | $X_A^-$ | $0.24 \pm 0.01$              | $0.87 \pm 0.04$ (69%)        | $607 \pm 30$ (31%)           | 189                            |
| 7L- $\text{MoS}_2$        | $X_A^-$ | $0.69 \pm 0.03$              | $280 \pm 14$                 | -                            | 280                            |
| 3L- $\text{MoS}_2$        | $X_A^-$ | $0.66 \pm 0.03$              | $22 \pm 1.1$                 | -                            | 22                             |
| 1L- $\text{MoS}_2$        | $X_A^-$ | $0.48 \pm 0.02$              | $38 \pm 1.9$                 | -                            | 38                             |

**Table S4.** Best-Fit Parameters of  $X_C$  and C-Charge States in  $MoS_2$  Materials by a Multi-Exponential Function,  $I(t) \propto \sum_i A_i \exp(-t/\tau_i)$ , at a Relatively Low Pump Density in Figure S10.

| Sample                      | Probe          | $\tau_{\text{arising}}$ (ps) | $\tau_{\text{decay 1}}$ (ps) | $\tau_{\text{decay 2}}$ (ps) | $\tau_{\text{decay 3}}$ (ps) | $\tau_{\text{decay-avg}}$ (ps) |
|-----------------------------|----------------|------------------------------|------------------------------|------------------------------|------------------------------|--------------------------------|
| MoS <sub>2</sub> nanosheets | X <sub>C</sub> | -                            | 0.29 ± 0.01 (69%)            | 1483 ± 74 (31%)              | -                            | 460                            |
|                             | C-charge       | 3.09 ± 0.15                  | 213 ± 10                     | -                            | -                            | 213                            |
| 7L-MoS <sub>2</sub>         | X <sub>C</sub> | -                            | 0.12 ± 0.01 (87%)            | 295 ± 15 (13%)               | -                            | 38                             |
|                             | C-charge       | 1.58 ± 0.08                  | 324 ± 16                     | -                            | -                            | 324                            |
| 3L-MoS <sub>2</sub>         | X <sub>C</sub> | -                            | 3.80 ± 0.19 (40%)            | 62 ± 3.1 (50%)               | 829 ± 41 (10%)               | 115                            |
|                             | C-charge       | 0.87 ± 0.04                  | 58 ± 2.9                     | -                            | -                            | 58                             |
| 1L-MoS <sub>2</sub>         | X <sub>C</sub> | -                            | 5.38 ± 0.27 (40%)            | 47 ± 2.4 (50%)               | 469 ± 23 (10%)               | 73                             |
|                             | C-charge       | 0.76 ± 0.04                  | 32 ± 1.6 (71%)               | 194 ± 10 (29%)               | -                            | 79                             |

**Table S5.** Best-Fit Parameters of  $X_C$  and C-Charge States in  $\text{MoS}_2$  Materials by a Multi-Exponential Function,  $I(t) \propto \sum_i A_i \exp(-t/\tau_i)$ , at a Relatively High Pump Density in Figure 6.

| Sample                    | Probe    | $\tau_{\text{arising}}$ (ps) | $\tau_{\text{decay 1}}$ (ps) | $\tau_{\text{decay 2}}$ (ps) | $\tau_{\text{decay 3}}$ (ps) | $\tau_{\text{decay-avg}}$ (ps) |
|---------------------------|----------|------------------------------|------------------------------|------------------------------|------------------------------|--------------------------------|
| $\text{MoS}_2$ nanosheets | $X_C$    | -                            | $1.34 \pm 0.07$<br>(52%)     | $7.86 \pm 0.39$<br>(17%)     | $3335 \pm 167$<br>(31%)      | 1036                           |
|                           | C-charge | $1.85 \pm 0.05$              | $116 \pm 5.8$<br>(37%)       | $568 \pm 28$<br>(63%)        | -                            | 400                            |
| 7L- $\text{MoS}_2$        | $X_C$    | -                            | $0.31 \pm 0.005$<br>(62%)    | $19 \pm 0.8$ (13%)           | $450 \pm 15$<br>(25%)        | 115                            |
|                           | C-charge | $0.45 \pm 0.01$              | $179 \pm 9$ (49%)            | $512 \pm 26$<br>(51%)        | -                            | 349                            |
| 3L- $\text{MoS}_2$        | $X_C$    | -                            | $1.02 \pm 0.05$<br>(27%)     | $109 \pm 4.4$<br>(64%)       | $1483 \pm 74$<br>(9%)        | 204                            |
|                           | C-charge | $1.21 \pm 0.05$              | $127 \pm 6.3$<br>(94%)       | $2077 \pm 104$<br>(6%)       | -                            | 244                            |
| 1L- $\text{MoS}_2$        | $X_C$    | -                            | $1.96 \pm 0.10$<br>(28%)     | $74 \pm 3.3$ (72%)           | -                            | 54                             |
|                           | C-charge | $1.34 \pm 0.07$              | $79 \pm 4.0$                 | -                            | -                            | 79                             |
